# Supplementary material
Source: PubMed Central journal article supplement (PMC10947442)
Supplement: ART-74-1122-s001.pdf [file ART-74-1122-s001.pdf]

## ICMJE DISCLOSURE FORM

Date: 28 February 2022

Your Name: Bryce A. Binstadt

Manuscript Title: The Conundrum of Lung Disease and Drug Hypersensitivity-like Reactions in Systemic Juvenile Idiopathic Arthritis

Manuscript number (if known): ar-22-0105

In the interest of transparency, we ask you to disclose all relationships/activities/interests listed below that are related to the content of your manuscript. “Related” means any relation with for-profit or not-for-profit third parties whose interests may be affected by the content of the manuscript. Disclosure represents a commitment to transparency and does not necessarily indicate a bias. If you are in doubt about whether to list a relationship/activity/interest, it is preferable that you do so.

The following questions apply to the author’s relationships/activities/interests as they relate to the current manuscript only.

The author’s relationships/activities/interests should be defined broadly. For example, if your manuscript pertains to the epidemiology of hypertension, you should declare all relationships with manufacturers of antihypertensive medication, even if that medication is not mentioned in the manuscript.

In item #1 below, report all support for the work reported in this manuscript without time limit. For all other items, the time frame for disclosure is the past 36 months.

|                                                           |                                                                                                                                                                                | Name all entities with whom you have this relationship or indicate none (add rows as needed) | Specifications/Comments (e.g., if payments were made to you or to your institution) |
|-----------------------------------------------------------|--------------------------------------------------------------------------------------------------------------------------------------------------------------------------------|----------------------------------------------------------------------------------------------|-------------------------------------------------------------------------------------|
| <b>Time frame: Since the initial planning of the work</b> |                                                                                                                                                                                |                                                                                              |                                                                                     |
| 1                                                         | All support for the present manuscript (e.g., funding, provision of study materials, medical writing, article processing charges, etc.)<br><b>No time limit for this item.</b> | None                                                                                         |                                                                                     |
|                                                           |                                                                                                                                                                                |                                                                                              |                                                                                     |
|                                                           |                                                                                                                                                                                |                                                                                              |                                                                                     |
|                                                           |                                                                                                                                                                                |                                                                                              |                                                                                     |
|                                                           |                                                                                                                                                                                |                                                                                              |                                                                                     |
|                                                           |                                                                                                                                                                                |                                                                                              |                                                                                     |
| <b>Time frame: past 36 months</b>                         |                                                                                                                                                                                |                                                                                              |                                                                                     |
| 2                                                         | Grants or contracts from any entity (if not indicated in item #1 above).                                                                                                       | Pfizer                                                                                       | Clinical Research contract – payment to institution                                 |
|                                                           |                                                                                                                                                                                | Sobi                                                                                         | Clinical Research contract to start soon – payment to institution                   |
|                                                           |                                                                                                                                                                                |                                                                                              |                                                                                     |
| 3                                                         | Royalties or licenses                                                                                                                                                          | None                                                                                         |                                                                                     |
|                                                           |                                                                                                                                                                                |                                                                                              |                                                                                     |
|                                                           |                                                                                                                                                                                |                                                                                              |                                                                                     |

|    |                                                                                                              |                                      |  |
|----|--------------------------------------------------------------------------------------------------------------|--------------------------------------|--|
| 4  | Consulting fees                                                                                              | ____ None                            |  |
|    |                                                                                                              |                                      |  |
|    |                                                                                                              |                                      |  |
| 5  | Payment or honoraria for lectures, presentations, speakers bureaus, manuscript writing or educational events | ____ None                            |  |
|    |                                                                                                              |                                      |  |
|    |                                                                                                              |                                      |  |
| 6  | Payment for expert testimony                                                                                 | ____ None                            |  |
|    |                                                                                                              |                                      |  |
|    |                                                                                                              |                                      |  |
| 7  | Support for attending meetings and/or travel                                                                 | ____ None                            |  |
|    |                                                                                                              |                                      |  |
|    |                                                                                                              |                                      |  |
| 8  | Patents planned, issued or pending                                                                           | ____ None                            |  |
|    |                                                                                                              |                                      |  |
|    |                                                                                                              |                                      |  |
| 9  | Participation on a Data Safety Monitoring Board or Advisory Board                                            | ____ None                            |  |
|    |                                                                                                              |                                      |  |
|    |                                                                                                              |                                      |  |
| 10 | Leadership or fiduciary role in other board, society, committee or advocacy group, paid or unpaid            | Rheumatology Research Foundation BOD |  |
|    |                                                                                                              |                                      |  |
|    |                                                                                                              |                                      |  |
| 11 | Stock or stock options                                                                                       | ____ None                            |  |
|    |                                                                                                              |                                      |  |
|    |                                                                                                              |                                      |  |
| 12 | Receipt of equipment, materials, drugs, medical writing, gifts or other services                             | ____ None                            |  |
|    |                                                                                                              |                                      |  |
|    |                                                                                                              |                                      |  |
| 13 | Other financial or non-financial interests                                                                   | ____ None                            |  |
|    |                                                                                                              |                                      |  |
|    |                                                                                                              |                                      |  |

Please place an "X" next to the following statement to indicate your agreement:

I certify that I have answered every question and have not altered the wording of any of the questions on this form.

## ICMJE DISCLOSURE FORM

Date: 2/28/2022

Your Name: Peter A. Nigrovic, MD

Manuscript Title: The Conundrum of Lung Disease and Drug Hypersensitivity-like Reactions in Systemic Juvenile Idiopathic Arthritis

Manuscript number (if known): ar-22-0105

In the interest of transparency, we ask you to disclose all relationships/activities/interests listed below that are related to the content of your manuscript. "Related" means any relation with for-profit or not-for-profit third parties whose interests may be affected by the content of the manuscript. Disclosure represents a commitment to transparency and does not necessarily indicate a bias. If you are in doubt about whether to list a relationship/activity/interest, it is preferable that you do so.

The following questions apply to the author's relationships/activities/interests as they relate to the **current manuscript only**.

The author's relationships/activities/interests should be **defined broadly**. For example, if your manuscript pertains to the epidemiology of hypertension, you should declare all relationships with manufacturers of antihypertensive medication, even if that medication is not mentioned in the manuscript.

In item #1 below, report all support for the work reported in this manuscript without time limit. For all other items, the time frame for disclosure is the past 36 months.

|                                                           |                                                                                                                                                                                | Name all entities with whom you have this relationship or indicate none (add rows as needed) | Specifications/Comments (e.g., if payments were made to you or to your institution) |
|-----------------------------------------------------------|--------------------------------------------------------------------------------------------------------------------------------------------------------------------------------|----------------------------------------------------------------------------------------------|-------------------------------------------------------------------------------------|
| <b>Time frame: Since the initial planning of the work</b> |                                                                                                                                                                                |                                                                                              |                                                                                     |
| 1                                                         | All support for the present manuscript (e.g., funding, provision of study materials, medical writing, article processing charges, etc.)<br><b>No time limit for this item.</b> | <u>None</u>                                                                                  |                                                                                     |
|                                                           |                                                                                                                                                                                |                                                                                              |                                                                                     |
|                                                           |                                                                                                                                                                                |                                                                                              |                                                                                     |
|                                                           |                                                                                                                                                                                |                                                                                              |                                                                                     |
|                                                           |                                                                                                                                                                                |                                                                                              |                                                                                     |
|                                                           |                                                                                                                                                                                |                                                                                              |                                                                                     |
| <b>Time frame: past 36 months</b>                         |                                                                                                                                                                                |                                                                                              |                                                                                     |
| 2                                                         | Grants or contracts from any entity (if not indicated in item #1 above).                                                                                                       | BMS                                                                                          |                                                                                     |
|                                                           |                                                                                                                                                                                | Pfizer                                                                                       |                                                                                     |
|                                                           |                                                                                                                                                                                | Novartis                                                                                     |                                                                                     |
| 3                                                         | Royalties or licenses                                                                                                                                                          | UpToDate                                                                                     |                                                                                     |
|                                                           |                                                                                                                                                                                | American Academy of Pediatrics                                                               |                                                                                     |
|                                                           |                                                                                                                                                                                |                                                                                              |                                                                                     |

|    |                                                                                                              |                                                      |                                        |
|----|--------------------------------------------------------------------------------------------------------------|------------------------------------------------------|----------------------------------------|
| 4  | Consulting fees                                                                                              | BMS, Cerecor, Exo Therapeutics, Novartis, and Pfizer |                                        |
| 5  | Payment or honoraria for lectures, presentations, speakers bureaus, manuscript writing or educational events | Pfizer                                               | Research seminar on neutrophil biology |
| 6  | Payment for expert testimony                                                                                 | ___ None                                             |                                        |
| 7  | Support for attending meetings and/or travel                                                                 | ___ None                                             |                                        |
| 8  | Patents planned, issued or pending                                                                           | ___ None                                             |                                        |
| 9  | Participation on a Data Safety Monitoring Board or Advisory Board                                            | Miach Orthopedics                                    |                                        |
| 10 | Leadership or fiduciary role in other board, society, committee or advocacy group, paid or unpaid            | CARRA<br>Arthritis National Research Foundation      |                                        |
| 11 | Stock or stock options                                                                                       | ___ None                                             |                                        |
| 12 | Receipt of equipment, materials, drugs, medical writing, gifts or other services                             | ___ None                                             |                                        |
| 13 | Other financial or non-financial interests                                                                   | ___ None                                             |                                        |

Please place an "X" next to the following statement to indicate your agreement:

**X** I certify that I have answered every question and have not altered the wording of any of the questions on this form.
